# Supplementary figures and images for: Soluble CD137 as a dynamic biomarker to monitor agonist CD137 immunotherapies
Source: PubMed Central journal article supplement — J Immunother Cancer. 2022 Mar 2;10(3):e003532. doi: 10.1136/jitc-2021-003532 (PMC8896037; doi:10.1136/jitc-2021-003532), 2022-03-02

Fig S1.

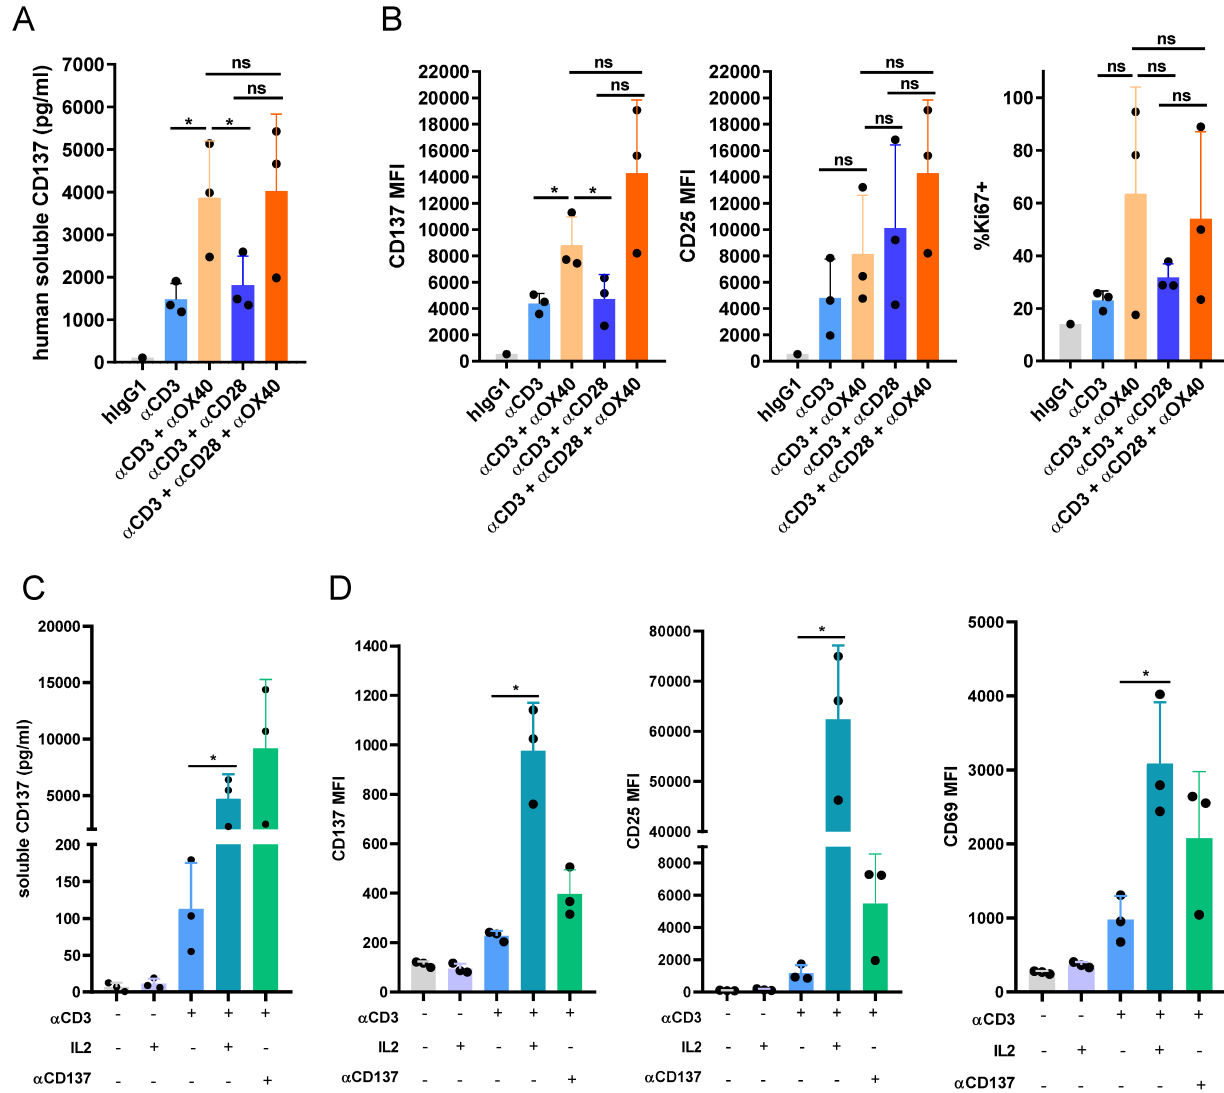

Fig S2.

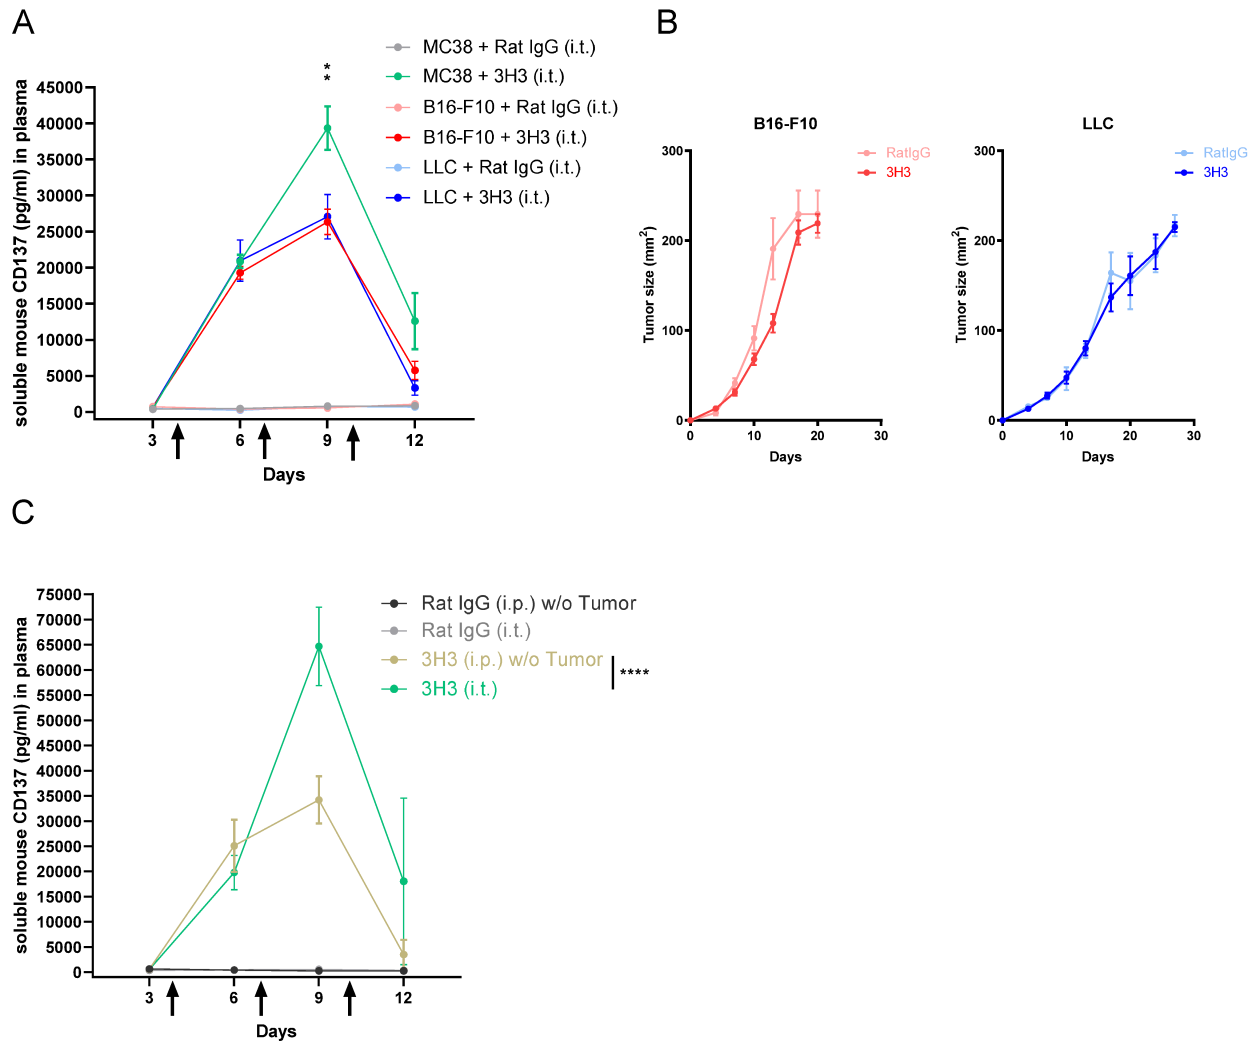

Fig S3.

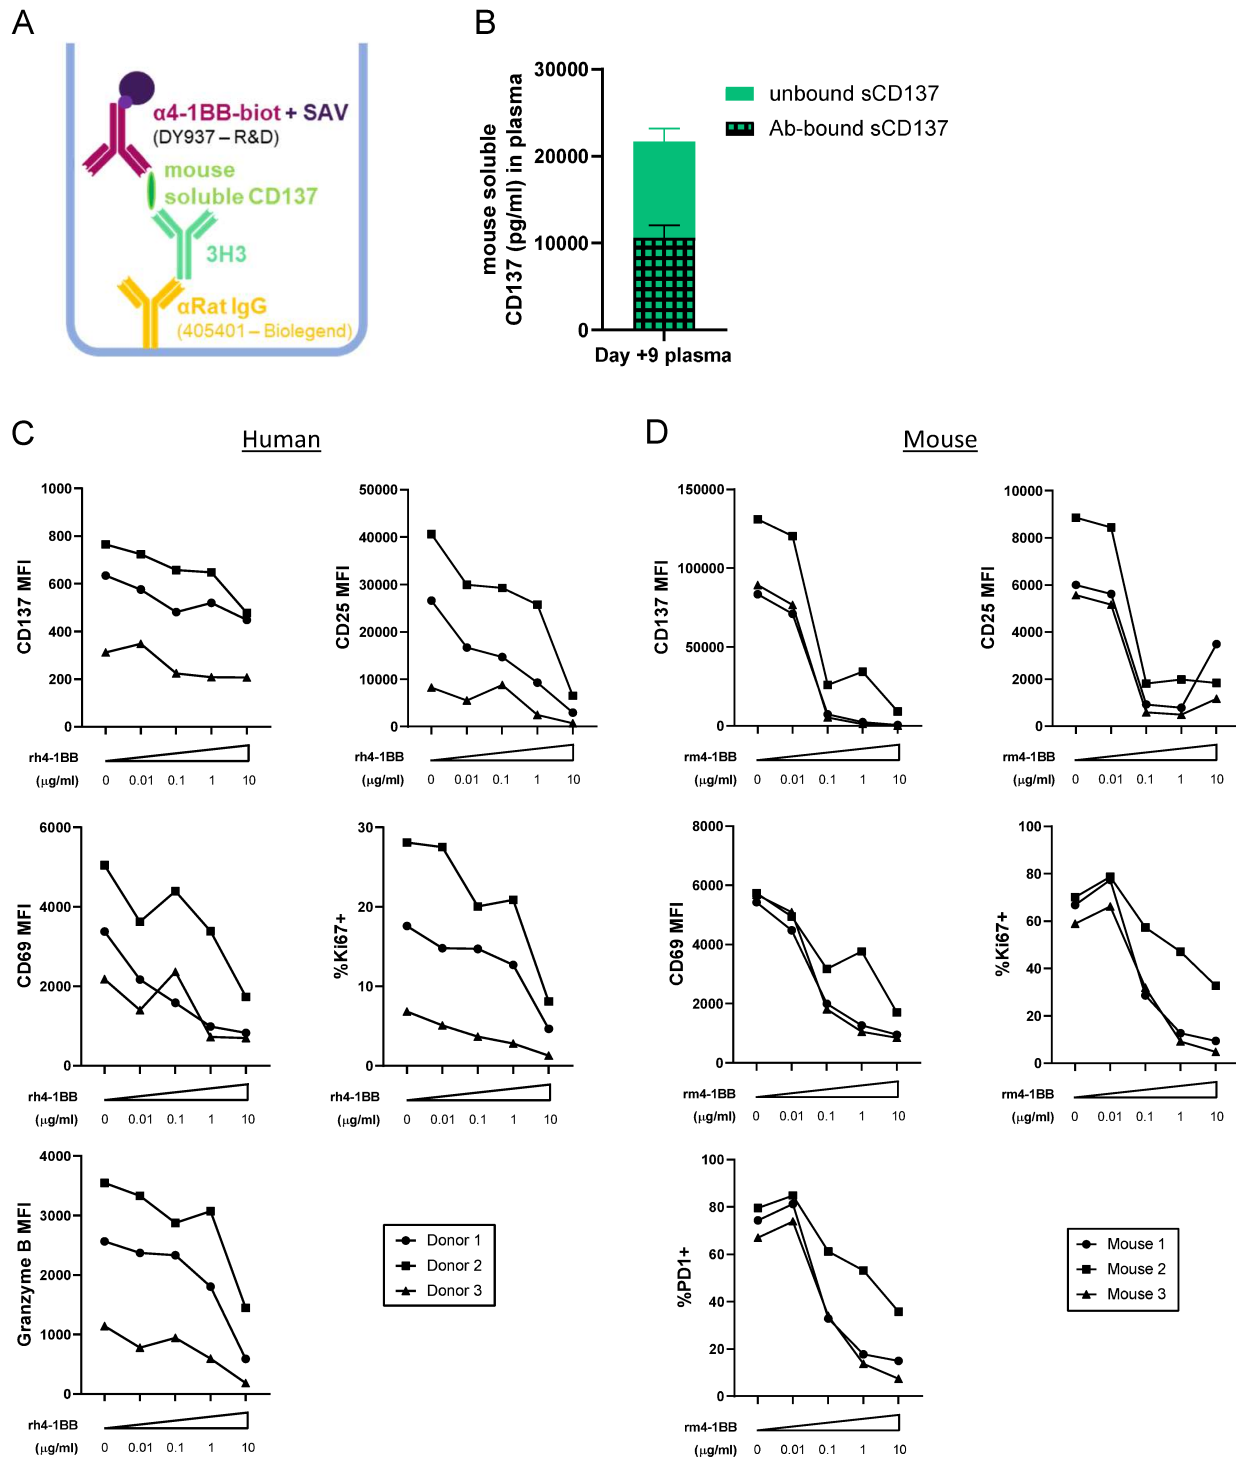

Fig S4.

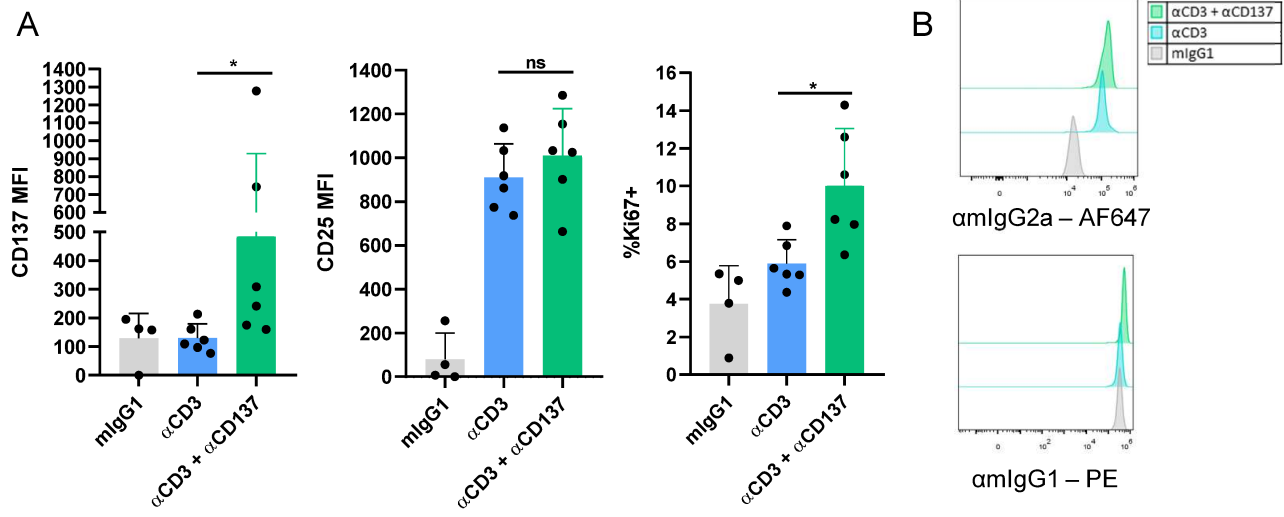

Fig S5.

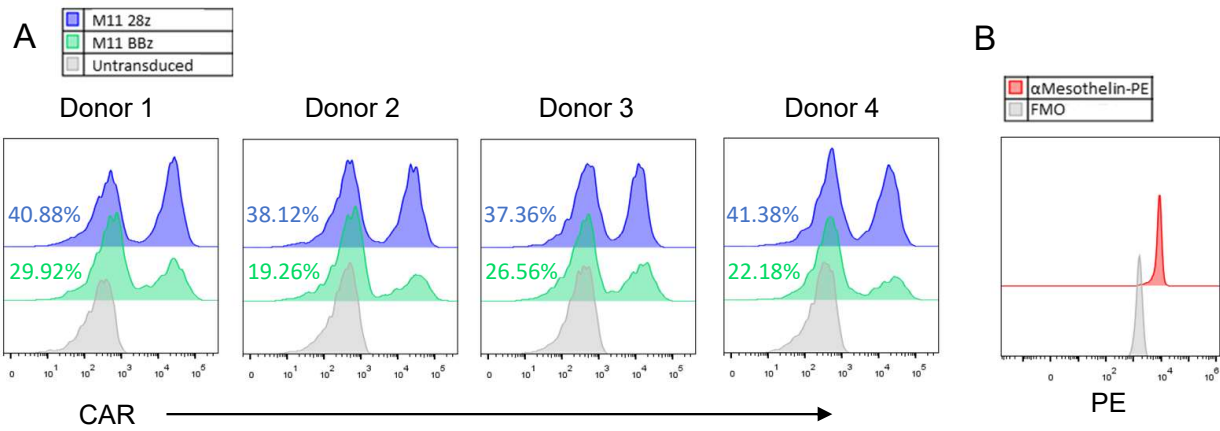

Supplement: jitc-2021-003532supp001.pdf [file jitc-2021-003532supp001.pdf]
